# Supplementary material for: Robust and inducible genome editing via an all-in-one prime editor in human pluripotent stem cells
Source: PubMed Central journal article supplement (PMC11685797; doi:10.1038/s41467-024-55104-1), 2024-12-30
Supplement: 41467_2024_55104_MOESM3_ESM.pdf [file 41467_2024_55104_MOESM3_ESM.pdf]

## Robust and inducible genome editing via an all-in-one prime editor in human pluripotent stem cells

Corresponding Author: Dr Ting Zhou

This manuscript has been previously reviewed at another journal. This document only contains information relating to versions considered at Nature Communications.

**This file contains all reviewer reports in order by version, followed by all author rebuttals in order by version.**

Version 0:

Reviewer comments:

Reviewer #1

(Remarks to the Author)

The authors responded to most of the issues I raised in the last review, and I felt that the revised edition was greatly improved. Recently, however, a paper demonstrating similar strategy in iPSC has been published in Nature Communications [Park et al., Nature Communications 15: 4002 (2024)]. It is necessary to clarify differences or superiority against the study.

Reviewer #2

(Remarks to the Author)

The authors have addressed my previous concerns; no additional experiments are needed.

Reviewer #3

(Remarks to the Author)

The authors have addressed my concerns about the clarity of the manuscript. The issue about tdTomato activation being by random deletion has also been covered by the additional sequencing data.

**Open Access** This Peer Review File is licensed under a Creative Commons Attribution 4.0 International License, which permits use, sharing, adaptation, distribution and reproduction in any medium or format, as long as you give appropriate credit to the original author(s) and the source, provide a link to the Creative Commons license, and indicate if changes were made.

In cases where reviewers are anonymous, credit should be given to 'Anonymous Referee' and the source.

The images or other third party material in this Peer Review File are included in the article's Creative Commons license, unless indicated otherwise in a credit line to the material. If material is not included in the article's Creative Commons license and your intended use is not permitted by statutory regulation or exceeds the permitted use, you will need to obtain permission directly from the copyright holder.

To view a copy of this license, visit <https://creativecommons.org/licenses/by/4.0/>

We greatly appreciate all the reviewers' carefully review and positive feedback.

## REVIEWERS' COMMENTS

Reviewer #1 (Remarks to the Author):

The authors responded to most of the issues I raised in the last review, and I felt that the revised edition was greatly improved. Recently, however, a paper demonstrating similar strategy in iPSC has been published in Nature Communications [Park et al., Nature Communications 15: 4002 (2024)]. It is necessary to clarify differences or superiority against the study.

We appreciate the reviewer's comments. We noticed the paper by Park et al. during our paper revision. Their study demonstrated an improvement in the editing efficiency of base editing and prime editing by simultaneously inhibiting p53 and MMR pathways in hPSCs. We agree with the reviewer it is important to clarify the differences and the superiority of our study.

We have now referenced this paper, and included a discussion in the revised manuscript, as below:

*"This additive effect aligns with the recently published paper by Park et al., where higher editing efficiency was achieved using the PE enzyme along with two pathway inhibitors<sup>43</sup>. Most importantly, we incorporated this PE-Plus system into the genome of hPSCs and demonstrated the applications of the iPE-Plus platform for inducible precise editing in hPSCs and their differentiated progeny. This system showcases high flexibility to install disease-relevant mutations in hPSCs and allows for the generation of monoallelic, biallelic, or even multiplex mutations via a one-step induction approach for stem cell research and disease modeling."*

Reviewer #2 (Remarks to the Author):

The authors have addressed my previous concerns; no additional experiments are needed.

Reviewer #3 (Remarks to the Author):

The authors have addressed my concerns about the clarity of the manuscript. The issue about tdTomato activation being by random deletion has also been covered by the additional sequencing data.
